# Supplementary material
Source: HighWire-hosted journal article supplement (https://www.life-science-alliance.org/content/6/5/e202201825/F6)

Source Data: Figure 4 D Blot 1

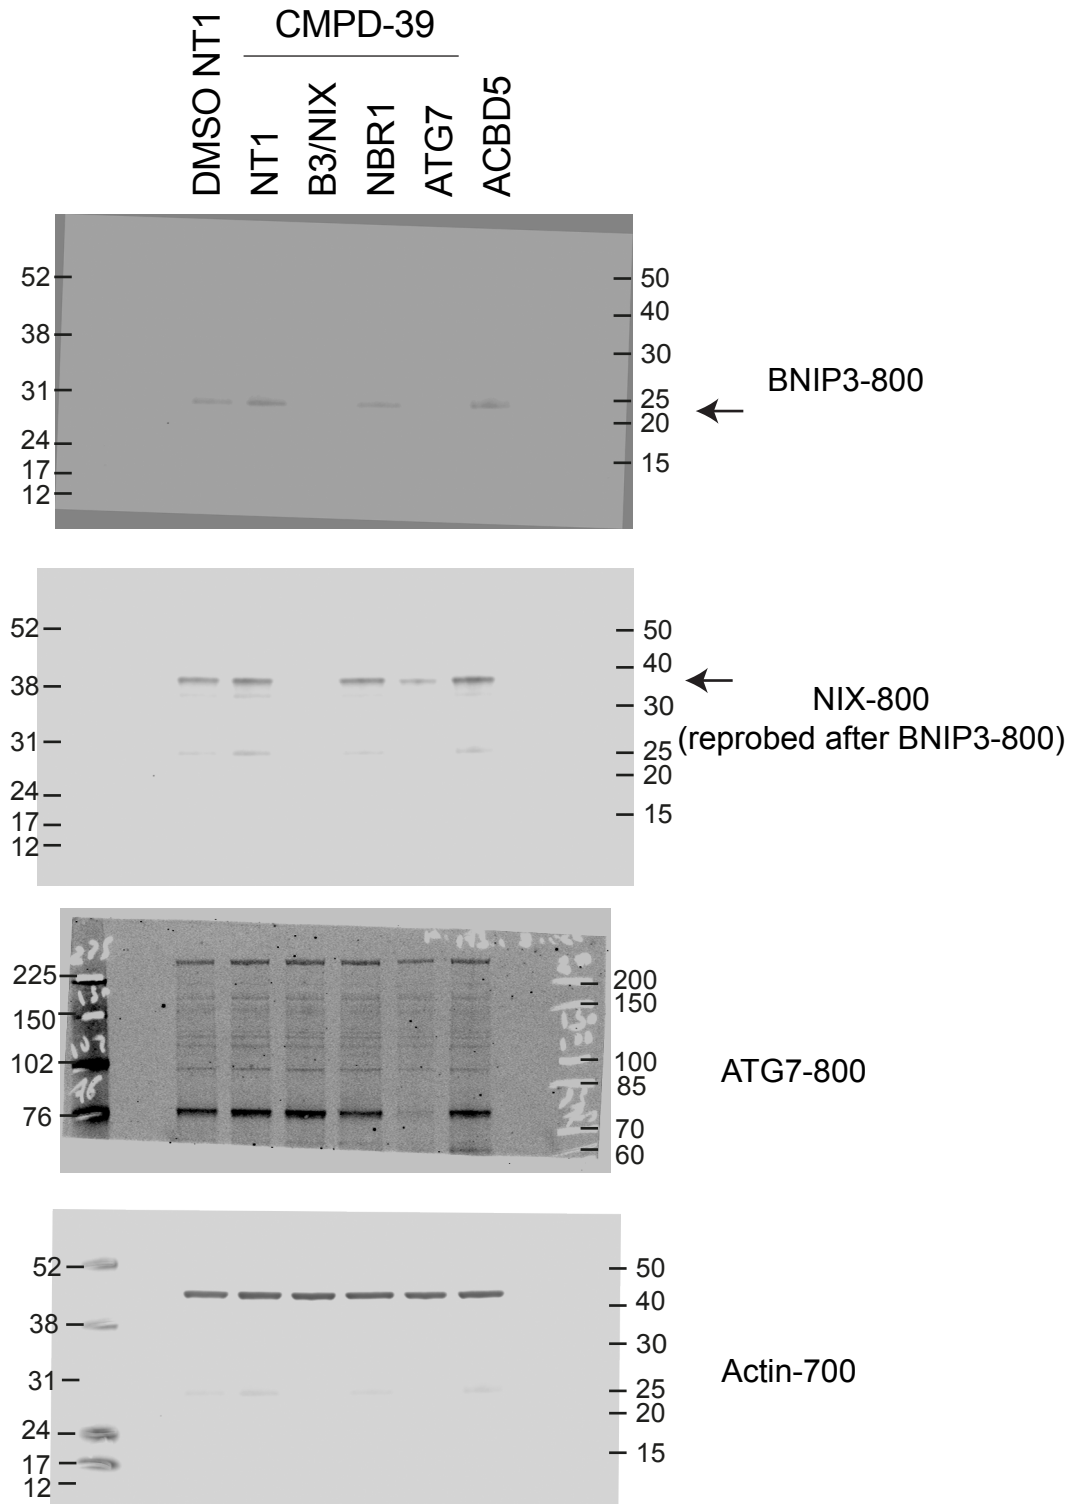

Supplement: inline-supplementary-material-4 [file inline-supplementary-material-4.pdf]
